# Supplementary material for: Coordinated Expression of HPV-6 Genes with Predominant E4 and E5 Expression in Laryngeal Papilloma
Source: PubMed Central journal article supplement (PMC7998961; doi:10.3390/microorganisms9030520), 2021-03-03
Supplement: microorganisms-09-00520-s001.pdf [file microorganisms-09-00520-s001.pdf]

Supplementary Materials for

**Coordinated Expression of HPV-6 Genes with Predominant E4 and E5 Expression in  
Laryngeal Papilloma**

Taro Ikegami, Hitoshi Hirakawa, Narutoshi Tsukahara, Akikazu Murakami, Norimoto Kise, Asanori Kiyuna,  
Takayoshi Kosugi, Shinya Agena, Hidetoshi Kinjyo, Narumi Hasegawa, Masatomo Touyama, Shunsuke Kondo,  
Hiroyuki Maeda, Mikio Suzuki, Akira Ganaha

**Contents**

Figure S1. SDS-PAGE of cell lines and western blot analysis using the anti-E1<sup>E4</sup> antibody.

Table S1. Primers used in the present study.

Table S2. Target gene, method, standard DNA, detection range, and amplification efficiency  
in real-time PCR.

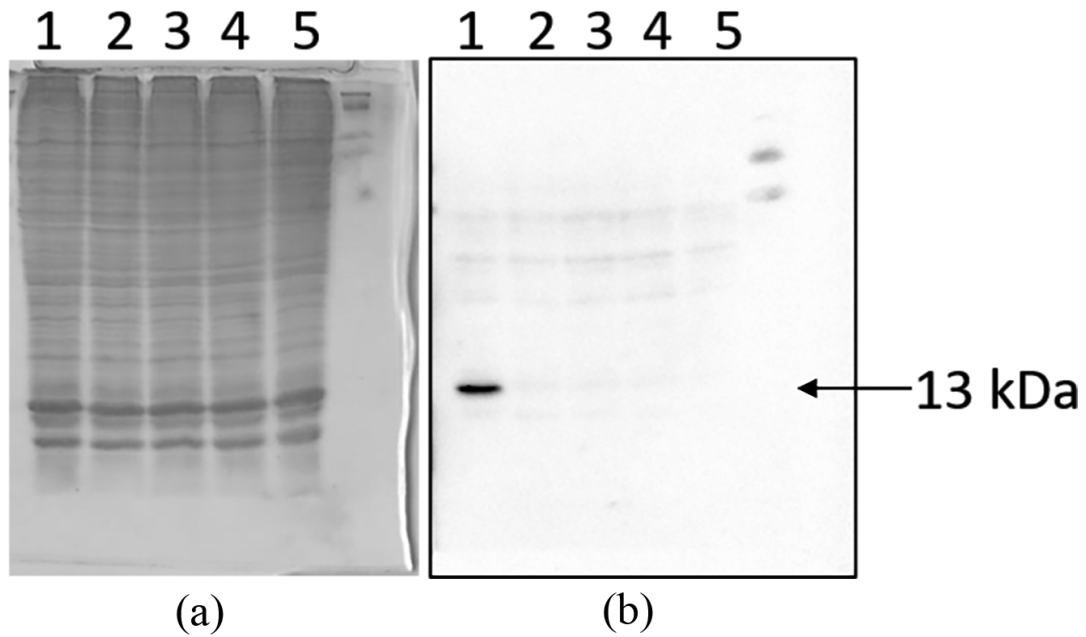

Figure S1. SDS-PAGE of cell lines and western blot analysis using the anti-E1<sup>E4</sup> antibody. SDS-PAGE analysis with Coomassie brilliant blue staining. (b) Western blot analysis with the anti-E1<sup>E4</sup> antibody. Lane 1 = HEK293T cells transfected with pcDNA3.1+ HPV-6 E4-3× FLAG; Lane 2 = HEK293T cells transfected with pcDNA3.1+HPV-11 E4-3× FLAG; Lane 3 = HEK293T cells transfected with pcDNA3.1+ CMTM7-3× FLAG; Lane 4 = HEK293T cells transfected with pcDNA3.1+; Lane 5 = HEK293T cells. A protein with a molecular weight of 13 kDa (E4) was observed only in lane 1.

Table S1. Primers used in the present study.

| <b>Screening primers</b>                       | <b>Sequence (5'–3')</b>              |
|------------------------------------------------|--------------------------------------|
| GP5+                                           | TTTGTTACTGTGGTAGATACTAC              |
| GP6+                                           | GAAAAATAAACTGTAAATCATATTC            |
| MY09                                           | CGTCCMARRGGAWACTGATC                 |
| MY11                                           | GCMCAGGGWCATAAYAATGG                 |
| PC04                                           | CAACTTCATCCACGTTCCACC                |
| GH20                                           | GAAGAGCCAAGGACAGGTAC                 |
| LCR-F                                          | ACGTAAGCGCGCCAAAAC                   |
| LCR-R                                          | ATGCATATGAATAAATCTCTGCTGTG           |
| <b>Cloning primers used for standard DNA</b>   | <b>Sequence (5'–3')</b>              |
| F1                                             | AAAGTGCAAATGCCTCCACG                 |
| R1                                             | TTTCTCTACCTGCGTTCCCG                 |
| F2                                             | TTATGGCTGCACGGTACGC                  |
| R2                                             | TAACCCCAACACCCCTACAA                 |
| F3                                             | GTGTGTTACTGTCCCGCTTG                 |
| R3                                             | CACACCTAATGGCTGTCCCC                 |
| F4                                             | GCAGGGGACAGCCATTAGG                  |
| R4                                             | TCCACATGACGCATGTACTCT                |
| <b>Real-time PCR primers and TaqMan probes</b> | <b>Sequence (5'–3')</b>              |
| E6-F                                           | GCGTGCTGCCTAGAATTTTCAT               |
| E6-R                                           | CAACAGTTGTTGCATATCCAGCAT             |
| E6-Probe                                       | FAM-CAAAGTGTCTATATTGGTTAATTTTTTC-MGB |
| E7-F                                           | GACGAAGTGGACGGACAAGA                 |
| E7-R                                           | ACACTGCACAACCAGTCGAA                 |
| E1-F                                           | TAAGTCCACGATTGGACGCC                 |
| E1-R                                           | TTTCTCTACCTGCGTTCCCG                 |
| E2-F                                           | GGCAAACACCACCTAAACGC                 |
| E2-R                                           | CAGGAGTCAGTGTCTGAC                   |
| E4-F                                           | CGAGGAGTCCAACAGTCACC                 |
| E4-R                                           | TCTTTGGTGCTGGTCGTGAT                 |
| E5a-F                                          | ATGGAAGTGGTACCTGTACAAATAGC           |

|                                                                                |                                                  |
|--------------------------------------------------------------------------------|--------------------------------------------------|
| E5a-R                                                                          | AGCAGTGTTAGTACTAGCACAGATG                        |
| E5b-F                                                                          | GGCTGGGTTTGTGGTTGTTAT                            |
| E5b-R                                                                          | ATTTGGTGTGTTTATCGCCTTG                           |
| L2-F                                                                           | GTGCGTCAGCTACACAGCTA                             |
| L2-R                                                                           | TGCCTATACCCAACCCTCCA                             |
| L1-F                                                                           | ACCACACGCAGTACCAACAT                             |
| L1-R                                                                           | TCCACATGACGCATGTACTCT                            |
| β-Globin-F                                                                     | TGGGTTTCTGATAGGCACTGACT                          |
| β-Globin-R                                                                     | AACAGCATCAGGAGTGGACAGAT                          |
| β-Globin-Probe                                                                 | FAM-<br>TCTACCCTTGGACCCAGAGGTTCTTTGAGT-<br>TAMRA |
| β-Actin-F                                                                      | GCGAGAAGATGACCCAGATC                             |
| β-Actin-R                                                                      | CCAGTGGTACGGCCAGAGG                              |
| β-Actin-Probe                                                                  | FAM-CCAGCCATGTACGTTGCTATCCAGGC-<br>TAMRA         |
| <b>Primers for ISH probes</b>                                                  | <b>Sequence (5'–3')</b>                          |
| E6-ISH-F                                                                       | CCACGTCTGCAACGACCATA                             |
| E6-ISH-R                                                                       | TTGTCCAGCAGTGTAGGCAG                             |
| E2-ISH-F                                                                       | ATGGAAGCAATAGCCAAGCG                             |
| E2-ISH-R                                                                       | GGAGTCAGTGTCTGCACATA                             |
| E4-ISH-F                                                                       | GGGAAGTATGTTATGGCAGCAC                           |
| E4-ISH-R                                                                       | TCTTTGGTGCTGGTCGTGAT                             |
| E5a-ISH-F                                                                      | AGCTGCAGGAACAACCAGCA                             |
| E5a-ISH-R                                                                      | GCTGTGTGTTTCCACAATGTAGTGG                        |
| E5b-ISH-F                                                                      | ATGATGCTAACATGTCAATTTAATG                        |
| E5b-ISH-R                                                                      | CTAATTCATATATATATAATCACCATCAGTAG                 |
| <b>Primers for pcDNA3.1(+)<sup>E1</sup><sup>E4</sup><br/>expression vector</b> | <b>Sequence (5'–3')</b>                          |
| HPV-6 E1 <sup>E4</sup> -F                                                      | GAATTCACCACCATGGCGGACGATTCAGCAC                  |
| HPV-11 E1 <sup>E4</sup> -F                                                     |                                                  |
| HPV-6 E1 <sup>E4</sup> -R                                                      | CTCGAGGCCACCGGATCCTAGGCGTAGCTGAA<br>CTGTACTGT    |
| HPV-11 E1 <sup>E4</sup> -R                                                     | CTCGAGGCCACCGGATCCTAGGCGTAGCTGCA<br>CTGTGA       |

R1 and R4 cloning primers used for standard DNA are the same as E1-R and L1-R real-time PCR primers, respectively. Since the HPV-6 sequence resembles that of HPV-11, HPV-6 E1<sup>E4</sup>-F is the same as HPV-11 E1<sup>E4</sup>-F.

Supplementary Table 2. Target gene, method, standard DNA, detection range, and amplification efficiency in real-time PCR.

| <b>Target gene</b> | <b>Method</b>    | <b>Standard DNA</b> | <b>Detection range</b>                               | <b>Amplification efficiency (%)</b> |
|--------------------|------------------|---------------------|------------------------------------------------------|-------------------------------------|
| <i>E6</i>          | TaqMan MGB probe | p1478 HPV-6E6       | 10 <sup>1</sup> –10 <sup>7</sup> copies              | 102.2                               |
| <i>E7</i>          | SYBR Green       | Clone A             | 2.0 × 10 <sup>1</sup> – 2.0 × 10 <sup>7</sup> copies | 107.6                               |
| <i>E1</i>          | SYBR Green       | Clone A             | 2.0 × 10 <sup>1</sup> – 2.0 × 10 <sup>7</sup> copies | 115.3                               |
| <i>E2</i>          | SYBR Green       | Clone B             | 2.0 × 10 <sup>1</sup> – 2.0 × 10 <sup>7</sup> copies | 101.8                               |
| <i>E4</i>          | SYBR Green       | Clone B             | 2.0 × 10 <sup>1</sup> – 2.0 × 10 <sup>7</sup> copies | 103.5                               |
| <i>E5a</i>         | SYBR Green       | Clone B             | 2.0 × 10 <sup>1</sup> – 2.0 × 10 <sup>7</sup> copies | 102.0                               |
| <i>E5b</i>         | SYBR Green       | Clone C             | 2.0 × 10 <sup>1</sup> – 2.0 × 10 <sup>7</sup> copies | 109.2                               |
| <i>L2</i>          | SYBR Green       | Clone C             | 2.0 × 10 <sup>1</sup> – 2.0 × 10 <sup>7</sup> copies | 109.5                               |
| <i>L1</i>          | SYBR Green       | Clone D             | 2.0 × 10 <sup>1</sup> – 2.0 × 10 <sup>7</sup> copies | 104.2                               |

|                                  |              |                     |                        |       |
|----------------------------------|--------------|---------------------|------------------------|-------|
| <i><math>\beta</math>-Actin</i>  | TaqMan probe | pCAG-mGFP-Actin     | $10^1$ – $10^7$ copies | 108.2 |
| <i><math>\beta</math>-Globin</i> | TaqMan probe | Human placental DNA | 0.3–300 ng             | 90.1  |

---
